# Supplementary material for: Chronic Hepatitis B Viral Activity Enough to Take Antiviral Drug Could Predict the Survival Rate in Malignant Lymphoma
Source: MDPI journal article supplement (doi:10.3390/v14091943), 2022-08-31
Supplement: s1 [file s1]

## Supplement data.

Supplement Table S1. Exclusion diagnosis codes of the National Health Insurance Service (NHIS).

| Exclusion diagnosis      | Codes                                                                                                                                                                                    |
|--------------------------|------------------------------------------------------------------------------------------------------------------------------------------------------------------------------------------|
| Hepatitis A              | B15.0, B15.9                                                                                                                                                                             |
| Hepatitis C              | B17.1, B18.2                                                                                                                                                                             |
| Hepatitis D              | B18.0                                                                                                                                                                                    |
| Hepatitis E              | B17.2                                                                                                                                                                                    |
| Acute hepatitis B        | B16.0, B16.1, B16.2, B16.9, B17.0                                                                                                                                                        |
| Other viral hepatitis    | B17.8, B17.9                                                                                                                                                                             |
| AIDS                     | B20.0, B20.1, B20.2, B20.3, B20.4, B20.5, B20.6, B20.7, B20.8, B20.9<br>B21.0, B21.1, B21.2, B21.3, B21.7, B21.8, B21.9<br>B22.0, B22.1, B22.2, B22.7, B23.0, B23.1, B23.2, B23.8, B24.0 |
| Transplantation          | Z94.4, T86.4<br>V005, V013, V014, V015                                                                                                                                                   |
| Hepatocellular carcinoma | C22.0, C22.1, C22.2, C22.3, C22.4, C22.5                                                                                                                                                 |

Supplement Table S2. Decompensation definition codes of the NHIS.

| <b>Decompensation</b>                                 | <b>ATC codes</b> | <b>Korean Drug Codes</b>                                    |
|-------------------------------------------------------|------------------|-------------------------------------------------------------|
| <b>Medication</b>                                     |                  |                                                             |
| Spironolactone                                        | C03DA01          | 231101ATB, 231102ATB,<br>262700ATB                          |
| Terlipressin                                          | H01BA04          | 236001BIJ, 236003BIJ,<br>236030BIJ                          |
| Somatostatin                                          | B02BX            | 230201BIJ, 230203BIJ                                        |
| Propranolol (with K74)                                | C07AA05          | 219901ATB, 219902BIJ,<br>219904ATB, 219905ACR,<br>219906ACR |
| <b>Procedure</b>                                      |                  |                                                             |
| Abdominal paracentesis                                | C8050            |                                                             |
| Endoscopic treatment of esophageal or gastric varices | Q7631, Q7633     |                                                             |

Supplement Table S3. Co-morbidity diagnosis codes of the NHIS.

| Co-morbidity diagnosis | Codes                                                                                                                                                                                                                                                                                                                                                                                                                                                                                                                                                                                                                                                                                                                                                                                                                                                                                                            |
|------------------------|------------------------------------------------------------------------------------------------------------------------------------------------------------------------------------------------------------------------------------------------------------------------------------------------------------------------------------------------------------------------------------------------------------------------------------------------------------------------------------------------------------------------------------------------------------------------------------------------------------------------------------------------------------------------------------------------------------------------------------------------------------------------------------------------------------------------------------------------------------------------------------------------------------------|
| Diabetes Mellitus      | E10.00, E10.01, E10.02, E10.03, E10.08, E10.10, E10.11, E10.12, E10.18, E10.20, E10.21, E10.22, E10.28, E10.31, E10.32, E10.33, E10.34, E10.38, E10.40, E10.41, E10.42, E10.48, E10.50, E10.51, E10.58, E10.60, E10.61, E10.62, E10.63, E10.64, E10.68, E10.70, E10.71, E10.72, E10.78, E10.8, E10.9, E11.00, E11.01, E11.02, E11.03, E11.08, E11.10, E11.11, E11.12, E11.18, E11.20, E11.21, E11.22, E11.28, E11.31, E11.32, E11.33, E11.34, E11.38, E11.40, E11.41, E11.42, E11.48, E11.50, E11.51, E11.58, E11.60, E11.61, E11.62, E11.63, E11.64, E11.68, E11.70, E11.71, E11.72, E11.78, E11.8, E11.9, E14.00, E14.01, E14.02, E14.03, E14.08, E14.10, E14.11, E14.12, E14.18, E14.20, E14.21, E14.22, E14.28, E14.31, E14.32, E14.33, E14.34, E14.38, E14.40, E14.41, E14.42, E14.48, E14.50, E14.51, E14.58, E14.60, E14.61, E14.62, E14.63, E14.64, E14.68, E14.70, E14.71, E14.72, E14.78, E14.8, E14.9 |
| Hypertension           | I10.1, I10.9, I11.0, I11.9, I12.0, I12.9, I13.0, I13.1, I13.2, I13.9, I15.0, I15.1, I15.20, I15.21, I15.22, I15.28, I15.80, I15.88, I15.9                                                                                                                                                                                                                                                                                                                                                                                                                                                                                                                                                                                                                                                                                                                                                                        |
| Chronic Kidney Disease | N18.1, N18.2, N18.3, N18.4, N18.5, N18.9                                                                                                                                                                                                                                                                                                                                                                                                                                                                                                                                                                                                                                                                                                                                                                                                                                                                         |

Supplement Table S4. Antiviral drug codes of the NHIS.

| <b>Antiviral drugs</b> | <b>ATC codes</b>                      | <b>Korean Drug Codes</b>                                                |
|------------------------|---------------------------------------|-------------------------------------------------------------------------|
| Lamivudine             | J05AF05, J05AR01, J05AR02,<br>J05AR13 | 180901ASY, 180901ATB,<br>180902ATB, 1809030ASY,<br>513100ATB, 517300ATB |
| Adefovir               | J05AF08                               | 457501ATB                                                               |
| Clevudine              | J05AF12                               | 487801ACH, 487802ACH,<br>487803ACH                                      |
| Telbivudine            | J05AF11                               | 506001ATB                                                               |
| Entecavir 0.5mg        | J05AF10                               | 487201ASY, 487202ATB,<br>487202ARD                                      |
| Entecavir 1.0mg        | J05AF10                               | 487203ATB, 487203ATD,<br>487230ASY                                      |
| Tenofovir              | J05AR08, J05AF07, J05AR03,<br>J05AR09 | 248100ATB, 493901ATB,<br>599900ATB, 623400ATB                           |

Supplement Table S5. Cumulative data for all HBV-related malignant lymphoma patients in Korea.

| year | HBV Cases | MBCL | TNK | Hodgkin | Unknown | Total |
|------|-----------|------|-----|---------|---------|-------|
| 2002 | 295,856   | 648  | 46  | 42      | 7       | 743   |
| 2003 | 320,182   | 984  | 64  | 66      | 10      | 1124  |
| 2004 | 330,524   | 1279 | 82  | 88      | 9       | 1458  |
| 2005 | 371,285   | 1653 | 103 | 103     | 12      | 1871  |
| 2006 | 387,894   | 1985 | 134 | 112     | 14      | 2245  |
| 2007 | 426,011   | 2312 | 161 | 119     | 15      | 2607  |
| 2008 | 446,601   | 2681 | 181 | 136     | 19      | 3017  |
| 2009 | 473,259   | 3125 | 214 | 153     | 18      | 3510  |
| 2010 | 482,848   | 3559 | 249 | 182     | 22      | 4012  |
| 2011 | 522,507   | 4151 | 287 | 226     | 22      | 4686  |
| 2012 | 512,352   | 4712 | 323 | 268     | 28      | 5331  |
| 2013 | 516,650   | 5344 | 381 | 295     | 29      | 6049  |
| 2014 | 536,837   | 5961 | 436 | 320     | 34      | 6751  |
| 2015 | 576,002   | 6798 | 532 | 366     | 41      | 7737  |
| 2016 | 646,273   | 7942 | 653 | 398     | 49      | 9042  |

MBCL, Mature B cell lymphoma; TNK, Mature T cell and NK-cell lymphoma; Hodgkin, Hodgkin lymphoma; Unknown, Unknown type of lymphoid neoplasm

Supplement Table S6. Mean and median age of newly diagnosed malignant lymphoma patients with chronic hepatitis B virus in Korea.

| year | Mean  | SD    | Q2 (median) | IQR       |
|------|-------|-------|-------------|-----------|
| 2003 | 51.10 | 15.25 | 52          | (41-62)   |
| 2004 | 52.18 | 14.60 | 53          | (43-63)   |
| 2005 | 51.11 | 15.31 | 53          | (41-62.5) |
| 2006 | 52.87 | 14.86 | 54          | (44-64)   |
| 2007 | 53.59 | 14.66 | 54          | (45-65)   |
| 2008 | 53.12 | 14.84 | 54          | (44-64)   |
| 2009 | 53.29 | 15.47 | 54          | (43-65)   |
| 2010 | 53.45 | 14.70 | 54          | (45-64)   |
| 2011 | 53.96 | 15.00 | 55          | (44-65)   |
| 2012 | 53.36 | 15.31 | 53          | (43-65)   |
| 2013 | 53.48 | 15.35 | 55          | (44-65)   |
| 2014 | 53.76 | 15.09 | 54          | (44-65)   |
| 2015 | 54.43 | 15.56 | 55          | (44-66)   |
| 2016 | 55.06 | 15.23 | 55          | (46-66)   |

Supplement Table S7. Prognostic factors of malignant lymphoma with chronic hepatitis B virus.

|                     | Univariate      |         | Multivariate    |         |
|---------------------|-----------------|---------|-----------------|---------|
|                     | HR(95%CI)       | p-value | HR(95%CI)       | p-value |
| Chronic hepatitis B |                 |         |                 |         |
| Age                 | 1.04(1.03-1.04) | <.001   | 1.04(1.03-1.04) | <.001   |
| Sex-male            |                 |         |                 |         |
| female              | 0.74(0.70-0.79) | <.001   | 0.74(0.70-0.79) | <.001   |
| Diabetes mellitus   | 1.55(1.46-1.65) | <.001   | 1.17(1.09-1.25) | <.001   |
| Hypertension        | 1.54(1.44-1.64) | <.001   | 1.06(0.98-1.14) | 0.136   |
| Cirrhosis           | 1.78(1.60-1.97) | <.001   | 1.64(1.47-1.83) | <.001   |
| Antivirals          | 1.20(1.07-1.34) | 0.002   | 1.28(1.13-1.45) | <.001   |
| Liver cirrhosis     |                 |         |                 |         |
| Age                 | 1.04(1.03-1.06) | <.001   | 1.04(1.03-1.06) | <.001   |
| Sex-male            |                 |         |                 |         |
| female              | 1.03(0.74-1.42) | 0.874   | 0.92(0.66-1.29) | 0.64    |
| Diabetes mellitus   | 1.02(0.76-1.37) | 0.885   | 0.98(0.72-1.33) | 0.887   |
| Hypertension        | 1.16(0.86-1.57) | 0.338   | 0.9(0.67-1.29)  | 0.66    |
| Antivirals          | 0.74(0.53-1.02) | 0.069   | 0.67(0.48-0.94) | 0.022   |
